# Supplementary material for: The FACT Histone Chaperone: Tuning Gene Transcription in the Chromatin Context to Modulate Plant Growth and Development
Source: PubMed Central journal article supplement (PMC7042381; doi:10.3389/fpls.2020.00085), 2020-02-19
Supplement: DataSheet_1.pdf [file DataSheet_1.pdf]

**Sc-Pob3** --MSTDFDRIYLN--QSKFSGRFR IADSGLGWKISTSGGSAANQARKPFLLPATELSTVQ 56  
**Sm-SSRP1** MGDHQAQFNILLGGRGGANPGQLKISSKGFWRKSGGGKV-----VDVAKDDVKSVS 52  
**Pp-SSRP1** ----HQFNSILLGGRGGTNPGLKINSGGFQWRKAGGGKV-----VEVSTSDIASLS 48  
**Hv-SSRP1** MTDGHHFNILLGGRAGTNLQGFVHSGGLAWKRQGGGKT-----IEIDKADLTSVT 52  
**Os-SSRP1** MTDGHLFNILLGGRAGSNPGQFVKVYSGGLAWKRQGGGKT-----IEIEKSDLTSVT 52  
**Zm-SSRP1** MTDGHHFNILLGGRGGTNPQGFVHSGGLAWKRQGGGKT-----IEIDKADVAVT 52  
**Sb-SSRP1** MTGGHHFNILLGGRGGTNPQGFVYSGGLAWKRQGGGKT-----IEIDKADVAVT 52  
**At-SSRP1** MADGHSFNNISLGRGGKNPGLKINSGGIQWKKQGGGKA-----VEVDRSDIVSVS 52  
**Pt-SSRP1** MTDGHLFNILLGGRGGTNPGLKISPGGILWKKQGGGKA-----VEVDRADILGVT 52  
**Vv-SSRP1** MSEGHLFNNISLGRGGTNPQQLRVHPGGILWKKQGGGKA-----VEVDKSDIVGVT 52  
**Gm-SSRP1** MTDGHLFNNILTLGGRGGTNPQGIKIYPGGIIWKRQGGGKL-----IEVDKSDIMGVT 52  
**Dm-SSRP1** MTDLSLEYNDINAEVRGVLCSGRLKMTQNIIFKNKTGTGV-----EQISAEDIDLIN 52  
**Hs-SSRP1** MAETLEFNDVYQEVKGSMDNDRRLRSRQGIIFKNSKTGV-----DNIQAGELTEGI 52  
: : : \* : : : . : : : \* : : :

**Sc-Pob3** WSRGCRGYDLKINTKNQGVILQDGFSDDDYLNLIKNDHFRRFNIQVEQREHSLRGWNWGT 116  
**Sm-SSRP1** WTRVRSYQMSIRLKAGSNVKTGFREQDVSSLNTFITSNIGVTPQDKPLAVSGRNWGEA 112  
**Pp-SSRP1** WTRVPKGFQGLVGLKAGRDVKNFNGFRESDMANLGSFFTTNMGITSEEKPLAISGRNWGDV 108  
**Hv-SSRP1** WMKVPRAYQLGVRVKDGLSYTFIGFREQDVSSLNFMQKNMGISPDEKQLSVGGHNWGM 112  
**Os-SSRP1** WMKVPRAYQLGVRTKDGLFYKFIGFREQDVSSLNFMQKNMGLSPDEKQLSVSGQNWGGI 112  
**Zm-SSRP1** WMKVPRAYQLGVRKAGLFYRFIGFREQDVSSLNFIQKNMGVTPDEKQLSVSGQNWGGI 112  
**Sb-SSRP1** WMKVPRAYQLGVRKIDGLFYRFIGFREQDVSSLNFIQKNMGVTPDEKQLSVSGHNWGGI 112  
**At-SSRP1** WTKVTKSNQLGVKTKDGLYKFIGFRDQDVPSSLSSFFQSSYGKTPDEKQLSVSGRNWGEV 112  
**Pt-SSRP1** WMKVPRTNQLSVLIIKGGPWYKFIGFRDQDLSTLTNFFQ-SHGITPEEKQLSVSGRNWGEV 111  
**Vv-SSRP1** WMKVPRTNQLGVRVKDGLYKFIGFREQDVTLNFFQHSCLNPEEKQLSVSGRNWGEV 112  
**Gm-SSRP1** WMKVPRSNQLGVQIKDGLYKFIGFRDQDVVSSLNFFQNTCGISVEEKQLSVSGRNWGEV 112  
**Dm-SSRP1** SQKFVGTWGLRVFTKGGVLRHRTGFRDSEHEKLGKFIKAAYSQEMVEKEMCVKGNWGT 112  
**Hs-SSRP1** WRRVALGHGLKLLTKNGHVYKDFRESEFEKLSDFFKTHYRLELMKDKLVCVGNWGT 112  
: : : \* : : : \*\* : : : : : : : : : \* \* \*

**Sc-Pob3** DLARNEMVFALNGKPTFEIPYARINNTNLTSKNEVGIEFNIQDEEYQP--AGDELVEMR 173  
**Sm-SSRP1** ELEGNTLSFVVGKPAFEICVADI SNTQVQKNDVQMEFHVDD-----TANEKDTLMEMS 167  
**Pp-SSRP1** TLEGSSLAFSVGGKHAFDVSIADVSQTQMQGKNEVMLEFHVDD---TTGASEKDTLMELS 165  
**Hv-SSRP1** DIDGSSLTFMVGSKQAFEFSLADVSTQTLQKTDVLEFHVDD---TTGANEKDSLMDMS 169  
**Os-SSRP1** DINGNMLTFMVGSKQAFEVSLADVSTQTLQMQGKTDVLEFHVDD---TTGGNEKDSLMDLS 169  
**Zm-SSRP1** DIDGNMLTFMVGSKQAFEVSLPDVAQTQMQGKTDVLELHVDD---TTGANEKDSLMDLS 169  
**Sb-SSRP1** DIDGNMLTFMVGSKQAFEVSLADVAQTQMQGKTDVLELHVDD---TTGANEKDSLMDLS 169  
**At-SSRP1** DLHGNTLTLFVVGSKQAFEVSLADVSTQTLQKNDVTFEFHVDD---TAGANEKDSLMEIS 169  
**Pt-SSRP1** DLNGNMLTLFVVGSKQAFEVSLADVSTQTLQKNDVILEIDAIISNYILLCLQKDSLMEIS 171  
**Vv-SSRP1** DLNGNMLTLFVVGSKQAFEVSLADVSTQTLQKNDVILEFHVDD---TTGANEKDSLMEIS 169  
**Gm-SSRP1** DLNGNMLAFTVVGSKQAFEVSLADVSTQTLQKNDVILEFHVDD---TTGANEKDSLMEIS 169  
**Dm-SSRP1** RFMGSVLSFDKESKTI FEVPLSHVQC-VTGKNEVTLEFHQND-----DAPVGLLEMR 164  
**Hs-SSRP1** KFGGQLLSFDIGDQPVFEIPLSNVQC-TTGKNEVTLEFHQND-----DAEVSLEMEVR 164  
: . : \* . : \* : : : : \* . : \* : : \* : :

**Sc-Pob3** FYIPGVIQTNVDENMTKKEESSNEVVPKEDGAEGEDVQMAVEEKSMAEAFYEELKEKAD 233  
**Sm-SSRP1** FHVPTNTTFVG-----DEERASAQVFCDKILSMAD 198  
**Pp-SSRP1** FHIPTNTTYIG-----DEERPPAQIFREKILSMGD 196  
**Hv-SSRP1** FHVPTSNTQFPG-----NENRTSAQILLEAILERAD 200  
**Os-SSRP1** FHVPTSNTQFLG-----DENRTAAQVLWETIMGVAD 200  
**Zm-SSRP1** FHVPTSNTQFVG-----DESRRPAHILWETILKFAD 200  
**Sb-SSRP1** FHVPTSNTQFVG-----DENRPPAHILWETILKFAD 200  
**Pt-SSRP1** FHIPNSNTQFVG-----DENRPPSQVFNFTIVAMAD 200  
**At-SSRP1** FHIPNNNTQYIG-----DENHPPAQVFRDLIVQKAD 202  
**Vv-SSRP1** FHIPNSNTQFVG-----DENRPPAQVFRDKIMSMAD 200  
**Gm-SSRP1** FHIPNSNTQFVG-----DENRPPAQVFRDKIMSMAD 200  
**Dm-SSRP1** FHIPAVES-----AEEDPVDFKHQNVMSKAS 190  
**Hs-SSRP1** FYVPPTQE-----DGVPVEAFAQNVLSKAD 190  
\* : : \* : : : : : : : : :

**Sc-Pob3** IGEV-AGDAIVSFQDVFFTTPRGRYDIDIYKNSIRLRGKTYEYKLQHRQIQRIVSLPKAD 292  
**Sm-SSRP1** VGPA-GGEAAVAFETVNVLTTPRGRYLVELHLSFLRLFG-ASDFKIQYTSVARLFLVLPKSA 256  
**Pp-SSRP1** VGPS-GAEAIALFEVHILTPRGRYNVELHASFLRLQGGANDFKIQYSSVVRFLILPKSN 255  
**Hv-SSRP1** TSSGSSGEAVVTFEGIAILTPRGRYAVDLHLSFLRLQGGANDFKIQYSSIVRFLFLPKSN 260  
**Os-SSRP1** V--DSSEEAVVTFEGIAILTPRGRYSVELHLSFLRLQGGANDFKIQYSSIVRFLFLPKSN 258  
**Zm-SSRP1** V--GSSEEPVVTTFEGIAILTPRGRYSVELHLSFLRLQGGANDFKIQYSSIVRFLFLPKSN 258  
**Sb-SSRP1** V--GSSEEPVVTDFEGIAILTPRGRYSVELHLSFLRLQGGANDFKIQYSSIVRFLFLPKSN 258  
**At-SSRP1** VSPG-VEDAVVTFESIAILTPRGRYNVELHLSFLRLQGGANDFKIQYSSVVRFLFLPKSN 259  
**Pt-SSRP1** VGAG-GEEAVVTFEGIAILTPRGRYSVELHLSFLRLQGGANDFKIQYSSVVRFLFLPKFN 261  
**Vv-SSRP1** VGAG-GEEAVVTFEGIAILTPRGRYSVELHLSFLRLQGGANDFKIQYSSVVRFLFLPKSN 259  
**Gm-SSRP1** VGAG-GEDAVVTFEGIAILTPRGRYSVELHMSFLRLQGGANDFKIQYSSVVRFLFLPKSN 259  
**Dm-SSRP1** VISA-SGESIAIFREIQILTTPRGRYDIKIFSTFFQLHGKTFDYKIPMDSVLRFLMLPHKD 249  
**Hs-SSRP1** VIQA-TGDAICIFRELQCLTPRGRYDIRIYPTFLHLHGKTFDYKIPYTTVLRFLFLPHKD 249  
: : \* : \* \* \* \* : : . : : \* : : \* : : \* : : \* : : \* : :

**Sc-Pob3** DIHLLLVLAIEPPLRQGGTTPYFVLVLFQKDEETEVLQNLLEDEDEYEENYKDKLKKQYDAK 352  
**Sm-SSRP1** QSSTYVVITLDDPPIRKGQTFYPHIVFQYQSEETELTPLISDELLNTKYKDRLAPQYKGL 316  
**Pp-SSRP1** QPHTFVVITLDDPPIRKGQTFYPHIVLQFPSEETIAECTLSIGEEELLNTKYKDRLQPAYKDL 315  
**Hv-SSRP1** NPHTIVVVITLDDPPIRKGQTLPHIVIQFETETVVQKNMKSRELLDEKYKDRLEESYQGL 320  
**Os-SSRP1** NPHTFVVVITLDDPPIRKGQTLPHIVIQFETEAVVERNLALTKVELLAEKYKDRLEESYKGL 318  
**Zm-SSRP1** NPHTFVVITLDDPPIRKGQTLPHIVIQFETEAVVERDLALSKELLVEKYKDRLEESYKGL 318  
**Sb-SSRP1** NPHTFVVITLDDPPIRKGQTLPHIVIQFETEAVVERDLALSKELLVDKYKDRLEESYKGL 318  
**At-SSRP1** QPHTFVVISLDDPPIRKGQTMYPHIVMQFETDTVVESELSISDELMTKFKDKLERSYKGL 319  
**Pt-SSRP1** QPHTFVVVITLDDPPIRKGQTLPHIVLQFDTDFVQSNLSMSEDLLYTKYKDKLEPSYKGL 321  
**Vv-SSRP1** QPHTFVVVITLDDPPIRKGQTLPHIVMQFETDYVQSELSLSEELLNSKYKDKLEPSYKGL 319  
**Gm-SSRP1** QPHTFVVIISLDDPPIRKGQTLPHIVMQFETDYVVESELAINEDLYNTKYKDKLDLSYKGL 319  
**Dm-SSRP1** SRQMFVFLSLDDPPIKQGQTRYHYLVLLFAPDEETIIELPFSEALRDKYEGKLEKESGP 309  
**Hs-SSRP1** QRQMFVVISLDDPPIKQGQTRYHFLILLFSKDEDISLTLNMNEEEVEKRFEGRLTKNMSG 309  
 . . . . . : \* : \* \* \* \* . : : : : : : : : : \* .

**Sc-Pob3** THIVLSHVVLKGLTDRRIVIPG-EYKSKYDQCAVSCSFKANEGYLYPLDNAFFFLTKPTLY 411  
**Sm-SSRP1** SYEVFVEILRGLSGAGITKPGTKFRSSQEGYAVRAALKAEEGLLYPLEKSFFFLKPPTL 376  
**Pp-SSRP1** SHDVFTQILKGLSGAKVTRPG-KFRSAQDGYCVRTSLKAEEGLTYPLEKSFFFLKPPTL 374  
**Hv-SSRP1** VHEVFKVLRGLSGAKVTRPG-SFRSYKNGYAVKSSLKAEDGLLYPLEKGFFFLKPPTL 379  
**Os-SSRP1** IHEVFTKVLRLGLSGAKVTRPG-SFRSCQDGYAVKSSLKAEDGLLYPLEKGFFFLKPPTL 377  
**Zm-SSRP1** IHEVFTKVLRLGLSGAKVTRPG-SFRSCQDGYAVKSSLKAEDGLLYPLEKGFFFLKPPTL 377  
**Sb-SSRP1** IHEVFTKVLRLGLSGAKVTRPG-SFRSCQDGYAVKSSLKAEDGLLYPLEKGFFFLKPPTL 377  
**At-SSRP1** IHEVFTTVLRWLSGAKITKPG-KFRSSQDGFVAVKSSLKAEDGVLYPLEKGFFFLKPPTL 378  
**Pt-SSRP1** IHEVFTTILRGLSGAKVTRPG-KFRSCQDGYAVKSSLKAEDGVLYPLEKSFFFLKPPTL 380  
**Vv-SSRP1** IHEVFTLILRGLSGAKVTKPG-KFRSCQDGYAVKSSLKAEDGVLYPLEKSFFFLKPPTL 378  
**Gm-SSRP1** IHEVFTTILRGLSGAKVTKPG-KFRSCQDGYAVKSSLKAEDGILYPLEKSFFFLKPPTL 378  
**Dm-SSRP1** VYEVMGKVMKVLIGRKITGPG-NFIGHSGTAAVGC SFKAAAGYLYPLERGFYIYHKPPLH 368  
**Hs-SSRP1** LYEMVSRVMKALVNRKITVPG-NFQGHSGAQCITCSYKASSGLLYPLERGFYIYHKPPVH 368  
 : . . : : \* . : \* \* . : . : : \* \* \* \* \* . : : \* \*

**Sc-Pob3** IPFSDVSMVNISRAGQTS---TSRFTDLEVLRLSRNGSTTFANISKEEQQLLEQFLKSK 468  
**Sm-SSRP1** IVYEEIDYVEFERHGAAGTSSMSKNFDLILRLKTD-QEHLFRNISRNEYHSLFKFISEK 435  
**Pp-SSRP1** ILHDEIEYLEFERHGAAGTSSISSHYFDLLIRLKSE-QEHQFRNIQRNEYHNLNFNISGK 433  
**Hv-SSRP1** ILHEEIEFVEFERHGAGG-ASMSQYFDLLVKLKTND-QEHLFRNIQRSEYHNLNFNINGK 437  
**Os-SSRP1** ILHEEIEFVEFERHGAGG-ASISSHYFDLLVKLKTND-QEHLFRNIQRSEYHNLNFNINGK 435  
**Zm-SSRP1** ILHEEIEFVEFERHGAGG-ASISSHYFDLLVKLKTND-QEHLFRNIQRNEYHNLNFNINGK 435  
**Sb-SSRP1** ILHEEIEFVEFERHGAGG-ASISFHYFDLLVKLKTND-QEHLFRNIQRNEYHNLNFNINGK 435  
**At-SSRP1** ILHDEIDYVEFERHAAGG-ANM--HYFDLLIRLKT-HEHLFRNIQRNEYHNLNFTISSK 434  
**Pt-SSRP1** ILHEEIDYVEFERHAAGG-SNM--HYFDLLIRLKTE-QEHLFRNIQRNEYHNLNFDIFSGK 436  
**Vv-SSRP1** ILHEEIDYVEFERHAAGG-SNM--HYFDLLIRLKTE-QEHLFRNIQRNEYHNLNFDIFSGK 434  
**Gm-SSRP1** ILHEEIDYVEFERHAAGG-SNM--HYFDLLIRLKSE-QEHLFRNIQRNEYHNLNFTISSK 434  
**Dm-SSRP1** IRFEEISSVNFARSGGST-----RSFDFEVTLKNQ-TVHIFSSIEKEEYAKLFDYITQK 421  
**Hs-SSRP1** IRFDEISFVNFARGTTTT-----RSFDFEIEETKQG-TQYTFSSIEREEYKGLDFVNAK 421  
 \* . . . . : : \* : \* \* : : \* \* . : \* \* . : \*

**Sc-Pob3** NLRVKNEEDREVQE---RLQTAGSDSDEEDIN--MG-----S-----AGEDDES 508  
**Sm-SSRP1** GLKILNFQTQG---SSAVAEALQ-GSDDEGVDPHLERIRIARATG-----DEGDSDEE 484  
**Pp-SSRP1** NLKIMNLDGAQG--TSGVAAALE-GSDDEGVDPHLNRIRSARESGAGL---GDESDDEE 487  
**Hv-SSRP1** GLKVMNLG-DGQGTG-GVTDVLR-DTDDVAVDPHLERIKNQA-----V---SSEASDEE 485  
**Os-SSRP1** HLKIMNLG-DGQGATGGVTAVLR-DTDDVAVDPHLERIKNQA-----G---D-EESDEE 483  
**Zm-SSRP1** NIKIMNLGGDGGQASGVVTDVLR-DTDDVAVDPHLERIKNQA-----G---D-EESDEE 484  
**Sb-SSRP1** NIKIMNLGGDGGQASGVVTDVLR-DTDDVAVDPHLERIKNQA-----G---D-DESDEE 484  
**At-SSRP1** GLKIMNLGGAG-T-ADGVAAVLGDNDDDVAVDPHLTRIRNQA-----A-----DESDEE 481  
**Pt-SSRP1** GMKIMNLGDMQ-T-AGGVAAVLQ-NDDDDVAVDPHLARIRNEA-----G---D-DESDEE 483  
**Vv-SSRP1** GLKIMNLGDVQ-T-ADGVAAVLQ-NDDDDVAVDPHLERIKNEA-----G---G-DESDEE 481  
**Gm-SSRP1** GLKILNLGDAQ-P-TVGIKKVL-NDDDDVAVDPHLERIKNEA-----G---G-DESDEE 481  
**Dm-SSRP1** KLHVSNMGKDKSGY---KDVDFGSDNENEPDAYLARLKAAREKEEDDD-DGDSDEEST 477  
**Hs-SSRP1** KLNKIKRNLKEGMN---PSYDEYADSDQHDAYLERMKEEGKIREENANDSSDDSGEET 478  
 : . : \* . : : : : : : : : : .

**Sc-Pob3** DEDFQVSSDNDNAEVAEEFSDAA-----LSDAEGGSDEERPSPKPKVE----- 552  
**Sm-SSRP1** DEDFVADK---DDEGSPTDDSGEE----EEDASDSDSGEQQDERPVKDKKKVEASQK-- 535  
**Pp-SSRP1** DEDFVAEK---DDAGSPTDESDEG----EPDGSDDGGERPKKKREKREDVAPKSA--- 535  
**Hv-SSRP1** DEDFVLHK---DDGSPTDDSGGE----ESDASESGG--EKEKSSKKEARSSKPPVKRK 535  
**Os-SSRP1** DEDFVADK---DDSGSPTDDSGEE----DSDASESGG--EKEKLSKKEASSKPPVKRK 533  
**Zm-SSRP1** DEDFVADK---DDSGSPTDDSGDE----ESDASDGG--EKEKSSKKEASSKPPVKRK 534  
**Sb-SSRP1** DEDFVADK---DDSGSPTDDSGDE----DSDASDGG--EKEKSSKKEASSKPPVKRK 534  
**At-SSRP1** DEDFVMGE--DDGGSPDDSGD-----DSDASEGGVGEIKEKSIKKEPKKEASS-- 531  
**Pt-SSRP1** DEDFVLGK---DDGSPTDDSGEE----ESDASESGD--EKENPGKDKFKREVSSS--- 530  
**Vv-SSRP1** DEDFVLDK---DDGSPTDDSGEE----ESDASESGG--EKEKPSKKEKKEPSVSVS--- 528  
**Gm-SSRP1** DSDFVADK---DDEGSPTDDSGAD-----DSDATDSDG--EKEKPAKKEKSKDLPSK--- 528  
**Dm-SSRP1** DEDFKPNE--NESDVAAEYDSNVESDSDSDSDASGGGG--DSDGAKKKKKEKSEKKE--- 530  
**Hs-SSRP1** DESFNPGE--EEDVAEEFSDNASASSSSN-----EG--DSDRDEKRRKQL----- 520  
 \* . \* . . : : \* . . : \*

|          |                                                                        |     |
|----------|------------------------------------------------------------------------|-----|
| Sc-Pob3  | -----                                                                  | 552 |
| Sm-SSRP1 | P-----A-ATKTKKKKDEEGDGDGDKKKKRRK <b>KDPNAPKRALSGFMYFSLAERENLKKS--T</b> | 586 |
| Pp-SSRP1 | P-----KRRKKKDEADGEDGGKRRKKK <b>KDPNAPKRALSAFMRFQLEERKKMKADPGQ</b>      | 589 |
| Hv-SSRP1 | PKGKDGESEKRRPKGKDGESEKRRPKKK <b>KDPNAPKRPMMPFMYFSMAERAGVKDS--N</b>     | 593 |
| Os-SSRP1 | PKGRDE-----EGSDKRKPKKK <b>KDPNAPKRAMTPFMYFSMAERGNMKNN--N</b>           | 578 |
| Zm-SSRP1 | HKARDD-----EGQEKKKPKKK <b>KDPNAPKRAMTPFMYFSMAERGNMKSS--N</b>           | 579 |
| Sb-SSRP1 | PKARDD-----EGHEKKKAKKK <b>KDPNAPKRAMTPFMYFSMAERGNMKSS--N</b>           | 579 |
| At-SSRP1 | -----KGLPPKRRKTVAADEGSKRKKPKKK <b>KDPNAPKRAMSGFMFFSQMERDNIKKE--H</b>   | 584 |
| Pt-SSRP1 | -----KAVTKRKS--RDGEESQKRRKPKKK <b>KDPNAPKRKSKSAYVFFSQMERENVKKS--N</b>  | 581 |
| Vv-SSRP1 | -----KASSSKKPKDGDGEDGSKRRKQKKK <b>KDPNAPKRAMSGFMFFSQTERENIKKS--T</b>   | 581 |
| Gm-SSRP1 | -----ASTSKK--SKDDEDGKRRKQKKR <b>KDPNAPKRAMSGFMFFSKLERENLKKT--N</b>     | 578 |
| Dm-SSRP1 | -----KKEKKHKEKERT--KKPSKKK <b>KDSGKPKRATTAFMLWLNDRSREIKRE--N</b>       | 577 |
| Hs-SSRP1 | -----KKAKMAKDRKSRKKPVEVKKG <b>KDPNAPKRPMAYMLWLNASREIKSD--H</b>         | 569 |
|          |                                                                        |     |
| Sc-Pob3  | -----                                                                  | 552 |
| Sm-SSRP1 | <b>PGISFKDVAKTLGERWKAMSKDEKEPFESQARVDKERYTKQMGGYNKGNAGGSTADDESS</b>    | 646 |
| Pp-SSRP1 | <b>ASMSFGEFGKSLGEEKWRNMSASDKAPYEADAKVDQERYKKAMAGYK-----</b>            | 635 |
| Hv-SSRP1 | <b>PDLAPTDVAKKLGEMWQKMSTEDKQPYILOSQADKKRYEKESAAAYRA--AAPVDVDAGSG</b>   | 651 |
| Os-SSRP1 | <b>PDLPTTEIAKKLGEMWQKMTGEEKQPYIQSQVDKKRYEKESAVYRG--AAAMDVDSGSG</b>     | 636 |
| Zm-SSRP1 | <b>PDLPTTEIAKKLGEMWQKMSGEEKQPYIQQAQVDKKRYEKESAVYRG--EATVDVDSGNE</b>    | 637 |
| Sb-SSRP1 | <b>PDLPTTEIAKKLGEMWQKMSSEEKQPYIQQAQVDKKRYEKESAVYRG--EATADVDSGNE</b>    | 637 |
| At-SSRP1 | <b>PGIAFGEVGVKVLGDKWRQMSADDEKPYEAKAQVDKQRYKDEISDYK--NPQPMNVDSGND</b>   | 642 |
| Pt-SSRP1 | <b>PGIVFGEITKALADKWNAMSAAEKEPYEEMARDDKQRYKQVNDYKKNKPNQPMNVDSGYE</b>    | 641 |
| Vv-SSRP1 | <b>PGIAFTEVGRVVLGDKWKKMTAAEKEPYEAKAQADKKRYRDEISGYK--SNPQPMNVDSGNE</b>  | 640 |
| Gm-SSRP1 | <b>PGISFTDVSRLVGEKWKLLSVEEKEPYEAKAREDKRYKDEISGYK--NPQPMNIDSGNE</b>     | 636 |
| Dm-SSRP1 | <b>PGIKVTEIAKKGEMWKEKLD--KSKWEDAAAKDKQRYHDEMRYKPEAGGSDNEKGGK</b>       | 635 |
| Hs-SSRP1 | <b>PGISITDLSKKAGEIWKGMSKEKKEEWRKAEDARRDYEKAMKEYEGGRGESSKRDKSKK</b>     | 629 |
|          |                                                                        |     |
| Sc-Pob3  | -----                                                                  | 552 |
| Sm-SSRP1 | D-----                                                                 | 647 |
| Pp-SSRP1 | -----                                                                  | 635 |
| Hv-SSRP1 | NGSD-----                                                              | 655 |
| Os-SSRP1 | GNESD-----                                                             | 641 |
| Zm-SSRP1 | SD-----                                                                | 639 |
| Sb-SSRP1 | SD-----                                                                | 639 |
| At-SSRP1 | SDSN-----                                                              | 646 |
| Pt-SSRP1 | SDS-----                                                               | 644 |
| Vv-SSRP1 | SDSE-----                                                              | 644 |
| Gm-SSRP1 | SDSA-----                                                              | 640 |
| Dm-SSRP1 | SSKK----RKTEPSPS----KKANTSGSGFKSKEYISDDDSTSSDDEKDNPAKSKP               | 686 |
| Hs-SSRP1 | KKKVVKMEKKSTPSRGSSSKSSRQLSESFKSKEFVSSDESSGENKSKKKRR----R               | 684 |
|          |                                                                        |     |
| Sc-Pob3  | -----                                                                  | 552 |
| Sm-SSRP1 | -----                                                                  | 647 |
| Pp-SSRP1 | -----                                                                  | 635 |
| Hv-SSRP1 | -----                                                                  | 655 |
| Os-SSRP1 | -----                                                                  | 641 |
| Zm-SSRP1 | -----                                                                  | 639 |
| Sb-SSRP1 | -----                                                                  | 639 |
| At-SSRP1 | -----                                                                  | 646 |
| Pt-SSRP1 | -----                                                                  | 644 |
| Vv-SSRP1 | -----                                                                  | 644 |
| Gm-SSRP1 | -----                                                                  | 640 |
| Dm-SSRP1 | PSDGDAKKKKAKSESEPEESEEDSNASDEDEDEEASD                                  | 723 |
| Hs-SSRP1 | SEDSE----EELASTPPSSEDSASGSDE-----                                      | 709 |

Figure S1. Amino acid sequence alignment of SSRP1 from different organisms. Sequences (plant, green; metazoan, red; fungal, blue) were retrieved by database searches using blastp (<https://blast.ncbi.nlm.nih.gov/>) using At-SSRP1 as query. The sequences were aligned using Clustal Omega (<https://www.ebi.ac.uk/Tools/msa/clustalo/>). The HMG-box domain present in SSRP1 proteins is highlighted in yellow, but it is absent from Sc-Pob3 (and other fungal Pob3 sequences; Pfab et al., 2018). Compared to their plant counterparts, metazoan SSRP1 proteins have a more extended domain C-terminal of the HMG-box. The species of which the protein sequences were retrieved are indicated as follows: *Arabidopsis thaliana* (At), *Drosophila melanogaster* (Dm), *Glycine max* (Gm), *Homo sapiens* (Hs), *Hordeum vulgare* (Hv), *Oryza sativa* (Os), *Physcomitrella patens* (Pp), *Populus trichocarpa* (Pt), *Saccharomyces cerevisiae* (Sc), *Selaginella moellendorffii* (Sm), *Sorghum bicolor* (Sb), *Vitis vinifera* (Vv), *Zea mays* (Zm).
