# Supplementary material for: The FACT Histone Chaperone: Tuning Gene Transcription in the Chromatin Context to Modulate Plant Growth and Development
Source: PubMed Central journal article supplement (PMC7042381; doi:10.3389/fpls.2020.00085), 2020-02-19
Supplement: DataSheet_2.pdf [file DataSheet_2.pdf]

|          |                                                                 |     |
|----------|-----------------------------------------------------------------|-----|
| Sc-SPT16 | -----MEELNIDFDVFKKRIELLYSKYNEFEFGS--                            | 28  |
| At-SPT16 | -----MADSRNGNARAPPSGVPPKAGNTYSIDVKNFISRARALYEHWKKHSA---         | 47  |
| Ta-SPT16 | -----MTDNGKAK-SG-----SGAAYTINLETFSKRLKVFYDHWNGNKS---            | 38  |
| Os-SPT16 | -----MADNGNAK-PGG----GGSGAYTINLDNFSKRLKVFYDHWKEHNS---           | 40  |
| Sb-SPT16 | -----MADNGNA-----K----GGSGAYTINLENFSKRLKVFYDHWKEHKS---          | 37  |
| Zm-Spt16 | MVALVNVSLLTNMADNGDA---K----GGSGAYAINIENFSKRLKVFYDHWKEHKS---     | 49  |
| Gm-SPT16 | -----MADHRNGSAQ-AANGKASAAGTAYSIDLNAFQTRLRSFYKHWDAHKT---         | 46  |
| Pt-SPT16 | -----MADQRNGTGQ-PSN----AARNAYADVEKFKTRLKALYSNWNENKA---          | 42  |
| Vv-SPT16 | -----MAEHRNGNAK-PSDGKASGAASPYAINLDNFTKRLKTLYSHWKEHSS---         | 46  |
| Sm-SPT16 | -----MADSRNGGDA-----KSKANDSGYDINIDDFVKRLNIFYKCWADEKN---         | 42  |
| Pp-SPT16 | -----MAE-RNG-----DGKGGRVQINLELYGKRLKLLNNKWKHEHKK---             | 36  |
| Hs-SPT16 | -----MAVTLDKDAYYRRVKRLYSNWRKG-----E                             | 25  |
| Dm-SPT16 | -----MSSFVLDKEAFVRRVKRLYTEWRAPSIGHD                             | 30  |
|          | : : . : * . : :                                                 |     |
| Sc-SPT16 | -----PNSLLFVL--GSSNAENPYQKTTILHNWLLSYEFPATLIALVPGKVIIITSSAKA    | 81  |
| At-SPT16 | DLWGSADALAIATPPAS--DDLRYLKSSALNIWLLGYEFPDTIMVFTKKQIHFLCSRKA     | 105 |
| Ta-SPT16 | DLWASSDAIAIATPPPS--EDLRYLKSTALDVWLLGYEFPETIIVFMQKQIHFLCSQKKA    | 96  |
| Os-SPT16 | DLWGSSNAIAIATPPPS--EDLRYLKSSALDVWLLGYEFPETIIVFMHKQIHFLCSQKKA    | 98  |
| Sb-SPT16 | DLWSSSDAIAIATPPPS--DDLRYLKSSALDIWLLGYEFPETIIVFMHKQIHVLCSSQKKA   | 95  |
| Zm-Spt16 | DLWGSSDAIAIATPPPS--DDLRYLKSSALDIWLLGYEFPETIIVFMHKQIHVLCSSQKKA   | 107 |
| Gm-SPT16 | DLWGSSDAIAVACPPPS--EDLRYLKSTALNLWLLGYEFPETIMVFSKKQIHILCSQKKA    | 104 |
| Pt-SPT16 | DLWGSSDVVAIATPPPS--EDLRYLKSSALNIWLLGYEFPETVMVFMKKQIHFLCSQKKA    | 100 |
| Vv-SPT16 | DLWGSSDALAIATPPAS--DDLRYLKSSALNIWLLGYEFPETIMVFMKKQIHFLCSQKKA    | 104 |
| Sm-SPT16 | ELWGGADAVAVFTPPRAEASELRYLKSSALNIWMLGYEFPDTLMVVFQALHFLCSQKKV     | 102 |
| Pp-SPT16 | EMWGGADAIIVTTPPAS--EDLRYLKSTALHIWLLGYEFPETVMVFMGALHFVCSKKA      | 94  |
| Hs-SPT16 | DEYANVDIAIVVS---VGVDIEIVYAKSTALQTLWLFGEYELTDTIMVFCDDKIIFMASKKKV | 82  |
| Dm-SPT16 | DALRNLDCIMSI---VGVEEDVMYKSMALQLWLLGYELTDTISVFCSDAVYFLTSKKKI     | 87  |
|          | : : . : * * : * . * : : * : * : : * *                           |     |
| Sc-SPT16 | KHLQKAIDLFK----DPESKITLELWQRNNKEPELNKKLFDDVIALIN---SAGTKVGP     | 134 |
| At-SPT16 | SLLLEVKKPA---HDELKLDVIMHVKPKGDDGTGLMDAIFRAIRDLSRGGDNDQVVGHI     | 162 |
| Ta-SPT16 | NLIGTLKDA---SEAVGSDIILHVSKNGDGDIDLMDILRAVSAQSK---SDTPVVGHI      | 150 |
| Os-SPT16 | NLIGTLKKA---NDAVGADIIVLHVKAKNDSVGLMEDIVRAVCAQSK---SDDPIVGHI     | 152 |
| Sb-SPT16 | NLIGTLKKA---NESVGVDIIVLHVKTNGDGDADMHDIVQAARNQSK---SDKPIVGHI     | 149 |
| Zm-Spt16 | NLIGTLKKA---NEAVGVDIIVLHVKTNSDGDADMHDIVHAARNQSK---SDKPIVGHI     | 161 |
| Gm-SPT16 | SILESVKKA---REAVDADLVLHVKPRNDGTALMDAIFRALS---KSDGRDTPVVGHI      | 158 |
| Pt-SPT16 | SLLLEVKKPA---REVVGVDVVMHVKAKTNDGTGLMDAIFHAIYAQSSADGKDTPIVGHI    | 157 |
| Vv-SPT16 | SLLLEVVRKSA---KEAVGVEVVMHVKAASDDGTGLMDAIFRAVRANSS---SHDTPVVGHI  | 159 |
| Sm-SPT16 | KILEELQRP---RTSCGVVVLHVKLKRSDEGGPQMLEILDTVKAQ---SRSPVLGVL       | 154 |
| Pp-SPT16 | AHLEELQKSS---KMLTGVDIHHMKERKQDGSVQMNSVLDVAVKGFSK---GKTPVGV      | 148 |
| Hs-SPT16 | EFLKQIANTKGNENANGAPAITLLIREKNESNKSFFDKMIEAIKES----KNGKIGVF      | 137 |
| Dm-SPT16 | EFLKQTQNI---TEEGFPEINLLVRDRDTDKDQGNFEKLIKALQNS----KKGKRLGVF     | 138 |
|          | : : : : . : : *                                                 |     |
| Sc-SPT16 | EKDSYQGKFMTEWNPVWEAAVKENEFNVIDISLGLSKVWEVKDVNEQAFLSVSS-KGSDK    | 193 |
| At-SPT16 | AREAPEGKLETWTE---RLKNaNFQFVDITGGLSDLFAVKDDTEVMSVKKAAAYLAYS      | 218 |
| Ta-SPT16 | AREAPEGKLETWAE---KLAGGSVQLADVTHGFSELFVAVKDATEIICVKKAAAYLTSSV    | 206 |
| Os-SPT16 | AREAPEGKLEAWAD---KLSSSSVQLTDITNGFSELFAMKDTSEITCVKKASYLTSSV      | 208 |
| Sb-SPT16 | AREAPEGKLETWTE---KLSGSGVRLTDVTHGFSELFVAVKDTTEVTVCVKKAAAYLTSSV   | 205 |
| Zm-Spt16 | AREAPEGKLETWIK---KLSGSGRLVDVTHGFSELFVAVKDTTEITCVKKAAAYLTSSV     | 217 |
| Gm-SPT16 | SREAPEGKLEMWTE---KLKNTKFLQNDVANGLSLFAAKNNEELTSIKRAAYLTTSV       | 214 |
| Pt-SPT16 | AREAPEGIILETWAE---KLKGEFELADVTSGLSDLIAVKDADELINVKKAAFLTFVSV     | 213 |
| Vv-SPT16 | GREAPEGKLEMWTE---KLKNADFQLSDITNGFSDLFAMKDTSTELTNVKKAAFLTSSV     | 215 |
| Sm-SPT16 | AREAPEGTFMEKWDE---LLSSSRLEKVDVAAGLCEMFVAVKDESEINNKKAAAYLSATA    | 210 |
| Pp-SPT16 | SREATEGSVMKWA---CLEASGAATVDVSGGFSEIFAVKDEEIEISNIKNASHLSAAI      | 204 |
| Hs-SPT16 | SKDKFPGEFMKSWND---CLNKEGFDKIDISAVVAYTIAVKEDGELNLMKKAASITSEV     | 193 |
| Dm-SPT16 | AKDAYPGEFSEAWK---SLTASKFEHVDISTIIAYLMCPKDESEINNIRKASLVSMIDI     | 194 |
|          | : : * . * : : * : : * : * : : *                                 |     |
| Sc-SPT16 | FMDLLSNEMVRAVDEELKITNAKLSDKIENKIDVVKFLKQLSPDLSALCPPNYKFNFDLL    | 253 |
| At-SPT16 | MKNVVVFNLESAIDEEKDVTHSALMDLTEKAILLEPTK-----ASVKLKPENV           | 265 |
| Ta-SPT16 | MKNFVVPKLEKVIDEERKVSHTSLMDDETEKAILDPLK-----AKVKLKPENI           | 253 |
| Os-SPT16 | MKNFVVPKLEKVIDEERKVSHTSLMDETEKAILDPLK-----VKVKLKAENV            | 255 |
| Sb-SPT16 | LKNFVVPKLEKVIDEERKVSHTSLMDDETEKAILDPLK-----VKVKLKPENV           | 252 |
| Zm-Spt16 | LKNFVVPKLEKVIDEERKVSHTSLMDDETEKAILDPLK-----VKVKLKPENV           | 264 |
| Gm-SPT16 | MKNFVVPKLENVIDEERKVSHTSLMDETEKAILLEPSK-----VNCKLKAENV           | 261 |
| Pt-SPT16 | MNNVVPKLENVIDEERKVSHTSLMDETEKAILDPTK-----AKAKLKAENV             | 260 |
| Vv-SPT16 | MKHVFPKLEKVIDEERKVSHTSLMDDETEKAILLEPAR-----VKVKLKAENV           | 262 |
| Sm-SPT16 | MKTFVVPKLEHVIDEERKVSHTSLMDETEKAILLEPPGK-----LKMKLAEGA           | 258 |
| Pp-SPT16 | LKSFVVPKLEVIDEERKVSHTSLMDETEKAILLEPPGK-----VKLKAEDV             | 250 |
| Hs-SPT16 | FNKFFKERVMEIVDADEKVRHSHKLAESVEKAIIEKK-----YLAGADPSTV            | 239 |
| Dm-SPT16 | FNKYLKDEIMDIDSDRKVKHKNLSDGCEAAIGEKK-----YTSGLDPRLL              | 240 |
|          | : : : : * : : * : : *                                           |     |

Sc-SPT16 DWTYSPIIQSGGKFDLRVSARSTNDQLYGN--GCILASCGRYNNYCSNITRFLIDPSE 311  
At-SPT16 DICYPPIFQSGGKFDLKPASAASNDPELLTYDPASIIICAVGARYNSYCSNVARTYLIDATS 325  
Ta-SPT16 DICYPPVFQSGGKFDLRPGASSNDDYLYYDPASIIICAIGRYSYCSNVARTFLIDATP 313  
Os-SPT16 DICYPPVFQSGGKFDLKPASSNDDYLYYDSASVIIICAIGARVYNYCSNMARTFLIDATP 315  
Sb-SPT16 DICYPPVFQSGGKFDLKPASSNDEYLYYDSASVIIICAIISKYSSYCSNVARTYLIDATP 312  
Zm-Spt16 DICYPPVFQSGGKFDLKPASSNDEYLYYDSASIIICAIISKYSSYCSNVARTYLIDATP 324  
Gm-SPT16 DICYPPIFQSGGEFDLRPSAASNDPELLHYDSASVILCAIGARYKSYCSNIARTFLIDADP 321  
Pt-SPT16 DICYPPIFQSGGEFDLRPSAASNDPELLYDSASVIIICAVGARYNSYCSNVARTFLIDATP 320  
Vv-SPT16 DICYPPIFQSGGEFDLRPSAASNDENLYYDSTSVIIICAIGRYSYCSNVARTFLIDANA 322  
Sm-SPT16 DVCYPPIFQSGGVFDLKASASQSNEDPLYYDATAVIIICALGGRYNMYCSNVARTYLIDADT 318  
Pp-SPT16 DICYPPVFQSGGVFDLKPSAVSNEEPLYDYLTLGVILCAIGARFRSYCSNVARSIMIDADK 310  
Hs-SPT16 EMCYPPIIQSGGNYNLKFSVSDKNHMHF---GAITCAMGIRFKSYCSNLVRTLMDVPSQ 296  
Dm-SPT16 DMAYPPIIQSGGAYSLKFSAVADKNPLHF---GVIVCSLGARYKSYCSNISRTFLVNPTE 297  
: \* \*::\*\*\* :.\*: .. : : : . \* : \* : : \*\*\*\*\* : \* : : :

Sc-SPT16 EMANNYDFLLTLQKEIVTNILKPGRTPKVEVYESVIEYIEKTKPELVPNFTKNIGSLIGLE 371  
At-SPT16 LQSKAYEVLLKAHEAAI-DALRSRGRKINTVYQAALSVVEKNAPEFVDKLTKSAGTGIGLE 384  
Ta-SPT16 AQSKAYETLLKAQEAAI-AACKPGNQMSAVFKAADVAVFEKNAPELLPNLTKSAGTGIGLE 372  
Os-SPT16 TQIKAYETLLKAHEAAL-EALKPGNRMSAVYQAAVDVIEKNAPELLRNLTKSAGTGIGLE 374  
Sb-SPT16 KQSKAYETLLKAHEAAV-QEVKPGNQMSAVYQAAVAVIEKDAPELLPNLTKSAGTGIGLE 371  
Zm-Spt16 TQNKAYETLRKAHEAAI-QQVKPGNQMSAVYQAAVAVIEKDAPELLPNLTKSAGTGIGLE 383  
Gm-SPT16 LQSRAYGVLLKAHEAVI-GSLKPGNRLSATYQAAVSVVENEAPDLISYLTKSAGTGIGIE 380  
Pt-SPT16 LQSKAYAVLLKAHEAAI-GALKPGNKVSAAYQAALSVVEEAEPELVPNLSKSAGTGIGLE 379  
Vv-SPT16 MQSKAYEVLLKAHEAAI-GALKPGNKVSAAYQAALAVVEKDAPELVSNLTKSAGTGIGLE 381  
Sm-SPT16 SQEKAYKALLKAQEAAI-NALRPGNLSAVYKAAATTLEREAPELSSFLTRSAGAGIGIE 377  
Pp-SPT16 TQEKAYKILLKAHEAAI-AALRPGNAMSVAYKAAAYAVVESGGPEFLPYFTKNAGTGIGIE 369  
Hs-SPT16 EVQENYFLLQLQEELL-KELRHGVKICDVYNAVMDVVKKQKPELLNKITKNLFGFMGIE 355  
Dm-SPT16 AMQENYTFVSVQEELL-KLLVPTKLCVDYKTLDFVKKKPKSMVDNLPKSGFGFANGLE 356  
. \* \* : : : \* : : : . : : \* : : : : \* : : : \* : : :

Sc-SPT16 FRDSNFILNVKNDYRKIQRGDCFNISFGFNLLKDSQS---ANNYALQLADTVQIPLDET 427  
At-SPT16 FRESGLNINAKNDK-VLRPKMAFVNSLGFQNLCESESRSKNNKFSLLLADTVLVDQ-- 441  
Ta-SPT16 FRESGLNINAKNDR-LIKEGMI FVNLGLSNIQAETN-NEKTKQF SLLLADTALVNDK-- 428  
Os-SPT16 FRESGLNINAKNDR-I IKAGMVFNVS LGLHNLQAEKK-SEKTKQY SLLLADTCLVPL--- 429  
Sb-SPT16 FRESGLNINAKNDR-KIKQGMVFNVS LGLHNVQAETT-SEKTKQF SLLLADTVLVNER-- 427  
Zm-Spt16 FRESGLNINAKNDR-RIKKGMVFNVS LGLHNIQAETT-SEKTKQF SLLLADTVLVNER-- 439  
Gm-SPT16 FRESGLNINAKNEQ-IVKEGMVFNVS LGFQNVQREST-KSKSKHF SLLLADTVI INKD-- 436  
Pt-SPT16 FRESGLNINAKNDR-VVKAKMVFNVS LGFQNLQNLQID-NPKIRNF SLLLADTVI VGDQ-- 435  
Vv-SPT16 FRESGLNINAKNDR-VLKPGMVFNVS LGFQNLQTDN-NPKTKQF SVLLADSVI VGEK-- 437  
Sm-SPT16 YRESGLSLNPRNEK-VIKAGMVFNVNI GLQNL EIKSS-NPKTRTYG LLLADTI VVRDK-- 433  
Pp-SPT16 FRESGLTLNAKNER-VIRPGMAFVNS LGFHNL TTESS-NPKSKTF SLLLADTAI VVEK-- 425  
Hs-SPT16 FREGSLVINSKNQY-KLKKGMVFS INLGFSDL TNKEGKKPEEKTYALF IGDTVLVDED-- 412  
Dm-SPT16 FRENSIVIGPKCQA-LLKKNMVFNLHVGISNL TNPEATDKEGKNYALF IGDTVLVGEQ-- 413  
:\* : : : : : : \* : \* : : : . : : : \* : : :

Sc-SPT16 EPPRFLT-NYTKAKSQISFYFNNEEEDNKKKS-SPATKVPSKPDNRNISKILRTKL-RG-E 483  
At-SPT16 KPELL-T-KCSKSVKDVAYSFKEDDEE---E---EKPRK---KARTSG-SE-NYITKTAL 487  
Ta-SPT16 AAELIL-T-NCSKAVKDVAYSFNEDDEEVPK---PKRA---KVEPNG-VE-ALPSKATL 476  
Os-SPT16 --ENLTA-SCSKLVKDVAYSFNDEDEVLPV---KK-----VEVNAK-EA-LPPTKATL 474  
Sb-SPT16 GHDILTA-PCSKAVKDVAYSFNEDDEDV-A----EV-----KMESKT-ID-VMPKATL 473  
Zm-Spt16 GHEVLTATA-PCSKAFKDVAYSFNEDDDAVAA---EV-----KIKSKT-ID-VMPKATL 486  
Gm-SPT16 KTEVVTS-MSSKALKDIAYSFNEDDEE---E---ENPSA---KADANG-AE-PLMSKTTL 483  
Pt-SPT16 NPDVVTS-KSSKAVKDVAYSFNEDDEE---EE---QPKA---RAEVNG-GE-NLMSKTTL 483  
Vv-SPT16 GPEVVTS-ISSKAVKDVAYSFNEDDEE---ERPKV---KPEANG-GE-AVSSKATL 487  
Sm-SPT16 GPDVVTS-LSSKAFQDIAYSFKDDEEPEERPRS-----KPASNG-AE-PVYVKATL 482  
Pp-SPT16 GPPEVPTLKCSKTYTDIAYSFKDDEEDEVKVEAKPKV---KSESNGSNE-PAVRMATL 480  
Hs-SPT16 GPATVLT-SVKKKVKNVGIFLKNEDDEEEEEE-----KDEAEDLLGRGSRAALL 460  
Dm-SPT16 SPASVMT-PSKKIKNVGIFIKDSDDEEDVDDK--KTA---KEDQGTEILGRSKRNAVL 466  
. : . \* : : : : :

Sc-SPT16 ARGGAEDAQKEQIRKENQKKLHEKLEKNGLLRFSAAD-ANGPDSEPRQYFKKYESYVRDS 542  
At-SPT16 -RSDDHVVSKEELRKHQAELARQKNEETARRLAGDSSGAGDSRSTAKTSADVAYKNVN 546  
Ta-SPT16 -RSDNQEMSKEELRKHQAELARQKNEETARRLAGGGSGNGDGRGPRNSNELVAYKNVN 535  
Os-SPT16 -RSDNQEMSKEELRKHQAELARQKNEETARRLAGVSGSGDGRGPRSSNELVAYKNVN 533  
Sb-SPT16 -RSDNQEMSKEELRKHQAELARQKNEETARRLAGVSGSGDGRGPARASNELVAYKNVN 532  
Zm-Spt16 -RSDNQEMSKEELRKHQAELARQKNEETARRLAGVGTGSGDGRGPARASNELVAYKNVN 545  
Gm-SPT16 -RSDNHEMSKEELRKHQAELARQKNEETARRLAGGNETGDNRSSRSTSAELVAYKNIN 542  
Pt-SPT16 -RSDNGEISKEELRKHQAELARQKNEETARRLAGGSAKGDNRRAASKTSTDLVAYKNVN 542  
Vv-SPT16 -RSDNQEMSKEELRKHQAELARQKNEETARRLAGGGSGAGDNRGAVKATGDLIAYKNVN 546  
Sm-SPT16 -RSDNQEMTKEDQRRQMQAELALKNEETARRLAGAFGHGEGHNMVKSSEGMTAYRNVD 541  
Pp-SPT16 -RSDNQEMTKEDQRRQMQAELARQKNEETARRLAGGGLSGDGGQPNKTTGDI IAYRNVD 539  
Hs-SPT16 TERTRNEMTAEKRRAHQKELAAQLNEEAKRRLTEQKGE---QQIQKARKSNVSYKNPS 516  
Dm-SPT16 ESKLRNEINTEEKRKEHQRELAQQLNERAKDRLARQGNS---KEVEKVRKNTVSYKISIS 522  
\* : \* : \* : \* : : : : \* : : : : : : \* : : :

Sc-SPT16 QLP--TNIRDLR IHVDWKSQTI ILLPIYGRVPPFHINSYKNGSKNEEG-EYTYLRLNFNSP 599  
At-SPT16 DM---PH-KELMIQVDTRNEAVLLPIYGLVPPFHVATIRTVSGNQDTNRNCYIRIIFNV 602  
Ta-SPT16 DV---PYSRELVIQVDQRNEAVLLPIYGSMPVPHVSTVKSVTSHQD-NRTCTIRIFFNV 591  
Os-SPT16 DV---PYARELVIQVDQKNEAVLLPIYGSMPVPHVSTVKSVTSHQD-NRTCTIRIFFNV 589  
Sb-SPT16 DV---PFVRDLVIQVDQKNEAVLLPIYGSMPVPHVSTVKSVTSHQD-NRTCTIRIFFNV 588  
Zm-Spt16 DV---PFVRDLVIQVDQKNEAVLLPIYGSMPVPHVSTVKSVTSHQD-NRTCTIRIFFNV 601  
Gm-SPT16 DL---PPPREAMIQIDQKSEAVLLPIGSMVPFHVAFIRTVSSQQDTNRNCYIRIIFNV 599  
Pt-SPT16 DI---PPARDLMIQIDQKNEAVLLPIYGNMVPFHVSTIRTVSSQQDTNRCTYIRIIFNV 599  
Vv-SPT16 DL---PPKELMIQVDQKNEAILLPIYGSMPVPHVATVKS SVSSQQDTNRCTYIRIIFNV 603  
Sm-SPT16 EL---PFSRELMIQVDQKNEAVLLPIYGI M VPFHIATVRTINNHQDL-NSSIIRIIFNV 597  
Pp-SPT16 DI---PA-RELKIHVDQKNEAVLLPVYGLLVPFHATVKS SVSSQQDG-GHSYIRIIFNV 594  
Hs-SPT16 LMPKEPHIREMKIYIDKKYETVIMPVFGIATPFIATIKNISMSVEG-DYTYLRINFCY 575  
Dm-SPT16 QMPREPEVKELKLVYDVKKYETVIMPVFGIQVPFHISTIKNISQSVEG-EYTYLRINFHP 581  
: : : : \* : : : : \* \* : : : : \* \* :

Sc-SPT16 GSSGGISKVVEELPYEESADNQFVRSITLRSKDGDRMSET-----FKQIADLKKE 649  
At-SPT16 GTPFNP-----DSNLSKNQGAIYLKEVFRKDSRHSSEV-----TQQIKTLRRQ 648  
Ta-SPT16 GMPFSND-----KDLKSQGAIYLKEITFRSKDPRHSSEV-----VQQIKTLRRQ 635  
Os-SPT16 GMPFSND-----SNLKSQGAIYLKEITFRSKDPRHSSEV-----VQQIKTLRRQ 633  
Sb-SPT16 GMPFSND-----SKLNSQGAIYLKEITFRSKDPRHSSEV-----VQQIKTLRRQ 632  
Zm-Spt16 GMPFSND-----SKFNSQGAIYLKEITFRSKDPRHSSEV-----VQQIKTLRRQ 645  
Gm-SPT16 GTPFSPH----DSNSMKFQGS IYLKEASFRSKDSRHISEV-----VQSIKTLRRQ 645  
Pt-SPT16 GAAPNP-----DSNLSKHQGAIYLKEVFRSKDPRHISEV-----VQLIKTLRRH 645  
Vv-SPT16 GTPFSPH----DSNSMKFQGS IYLKEVFRSKDPRHISEV-----VQMIKTLRRQ 649  
Sm-SPT16 GAGFTTN----DVPFQKFPHMIYLKEISFRSTDIKHSTQI-----VQMMKTLKRQ 643  
Pp-SPT16 GAGFGPN----DVPTQKFPFRSIYVKEVFRSNDTRHSYQV-----VQLIKTLRRQ 640  
Hs-SPT16 GSALGRN----EGNIFPNPEATFVKIETYRASNIKAPGEQTVPALNLQNAFRIKEVQKR 631  
Dm-SPT16 GATMGRN----EGGLYPQPEATFVKEVITYRSSNVKEHGVGAPSANLNNAFRIKEVQKR 637  
\* : : : : \* : : : : \* : : : : \*

Sc-SPT16 ATKREQERKALADVQQDKLIENK-TGRTRKLDQIFVRPNPDT--KRPSTVFIHENGIR 706  
At-SPT16 VMARESERAERATLVTQEKLQLAGNKFKPLRLSELWIRPPFSGR-KKIPGTLEAHANGFR 707  
Ta-SPT16 VASRESERAERATLVTQEKLQASNKTKQMLNDVWIRPPFGGRGRKLTGTLEAHVNGFR 695  
Os-SPT16 VASRESERAERATLVTQEKLQLTSNRKMPVRLSDVWIRPAFGGGRGRKLTGTLESHVNGFR 693  
Sb-SPT16 VASRESERAERATLVTQEKLQIGNRMKMLRLSDVWIRPAFGGGRGRKLTGNLEAHVNGFR 692  
Zm-Spt16 VASRESERAERATLVTQEKLQIGSNRMKMMRLSDVWIRPAFGGGRGRKLTGNLEAHVNGFR 705  
Gm-SPT16 VVARESERAERATLVTQEKLQLANRFRKPIRLSDLWIRPAFGGGRGRKIPGTLEAHVNGFR 705  
Pt-SPT16 VVARESERAERATLVTQEKLQLAGNRFRKPIRLTDLWIRPVFTGRGRKLPGALEAHVNGFR 705  
Vv-SPT16 VASRESERAERATLVTQEKLQLAGTRFRKPIRLSDLWIRPSFGGGRGRKLTGSLESHTNGFR 709  
Sm-SPT16 VSQRESEKAERATLVTQEKLQISK--GKAIRLSDLWIRPPFAGRKR--RGTLEAHVNGFR 700  
Pp-SPT16 VAQRESERAERATLVTQERLQIGK--GRPIRLSDLWIRPAFGGGRGRKMSGTLEAHVNGFR 698  
Hs-SPT16 YKTREAEKEKEGIVKQDSLVINLNRSNP-KLKDLYIRPNIAQ--KRMQGSLEAHVNGFR 688  
Dm-SPT16 FKTREAEEREKEDLVKQDQTLILSQNGNP-KLKDLYIRPNIVT--KRMTGSLEAHVNGFR 694  
\*\* \* : \* \* : \* : \* : : : \* : : \* \* \* :

Sc-SPT16 FQSPLRTDSRIDILFNSIKNLIFQSCKGELIVVIHHLKNPILMGKKKIQDVQFYREASD 766  
At-SPT16 YST-TRPDERVDLRFANIKHAFFQPAEKEMITLLHFHLHNNIMVGTKKTKDVQFYVEVMD 766  
Ta-SPT16 YST-SRADERVDIMYGNIKHAFQPAEKEMITLLHFHLHNNIMVGNKTKDVQFYVEVMD 754  
Os-SPT16 YST-SRADERVDIMYGNVKAFFQPAEKEMITLLHFHLHNNIMVGNKTKDVQFYVEVMD 752  
Sb-SPT16 YST-SRSDERVDIMFGNIKHAFQPAEKEMITLLHFHLHNNIMVGNKTKDVQFYVEVMD 751  
Zm-Spt16 YST-SRSDERVDIMFGNIKHAFQPAEKEMITLLHFHLHNNIMVGNKTKDVQFYVEVMD 764  
Gm-SPT16 YST-TRQDERVDIMFGNIKHSFFQPAENEMITLLHFHLHNNIMVGNKTKDVQFYVEVMD 764  
Pt-SPT16 FST-SRSEERVDIMFNSIKHAFFQPAEKEMITLLHFHLHNNIMVGNKTKDVQFYVEVMD 764  
Vv-SPT16 YST-SRSPERVDIMYGNIKHAFQPAEKEMITLLHFHLHNNIMVGNKTKDVQFYVEVMD 768  
Sm-SPT16 YST-MKAETVVDILYRNIRHAFFQPAEKEMITLLHFHLHNNIMVGNKTKDVQFYVEVMD 759  
Pp-SPT16 YST-MRQEEKVDIMYRNIKHAFFQPAEKEMITLVHFHLHNNIMVGTKKTKDVQFYVEVME 757  
Hs-SPT16 FTS-VRG-DKVDILYNNIKHALFQPCDGEIIVLHFHLKNAIMFGKKRHTDVQFYTEVGE 746  
Dm-SPT16 YIS-VRG-DKVDILYNNIKSAFFQPCDGEIIVLHFHLKYAIMFGKKKHVDVQFYTEVGE 752  
: : : : \* : : : \* \* : : \* \* : : \* \* : : \* \* : \* \* \* : \* \* :

Sc-SPT16 MSVDETGGGRRGQSRFRYRQDEDELEQEERKRRAALDKEFKYFADAIAEA-----SN 820  
At-SPT16 VVQSL-GGGR-----SAYDPDEIDEEQRERDRKNINMDFNHFANRVNDMWSQPQFAS 819  
Ta-SPT16 VVQTV-GGSRR-----SALDPDEIDEEQRERDRKNINMEFQNYINKVNDHWSQPQFKG 807  
Os-SPT16 VVQTL-GGNRR-----SALDPDEIDEEQRERDRKNINMDFQNFVNKVNDSHWSQPQFKG 805  
Sb-SPT16 VVQTV-GGSRR-----SALDPDEIDEEQRERDRKNINMDFQNFVNKVNDSHWSQPQFKG 804  
Zm-Spt16 VVQTL-GGSRR-----SALDPDEIDEEQRERDRKNINMDFQNFVNKVNDSHWSQPQFKG 817  
Gm-SPT16 MVQNV-GGGR-----SAYDPDELEEEQRERDRKNINVEFQTFVNRNLNDLWGQPQFNG 817  
Pt-SPT16 VVQTV-GGGR-----SAYDPDEIDEEQRERDRKNINMDFQSFVNRVNDLWSQPQFSG 817  
Vv-SPT16 VVQTV-GGGR-----SAYDPDEIDEEQRERDRKNINMDFQNFVNKVNDSHWSQPQFKG 821  
Sm-SPT16 GVQNV-GGSRR-----SHFDPDEIDEEQAERERKNKLNKEFEVFKVTDLWEPALRN 812  
Pp-SPT16 VVQTV-GGSRR-----SMDPDEIDEEQERDRKNINKEFEAFVVRMAELWDQPWRE 810  
Hs-SPT16 ITTDL-GKH-Q-----HMHDRDDLAEQEMERMRHKLKTAFAKNIEKVEAL-----TK 792  
Dm-SPT16 ITTDL-GKH-Q-----HMHDRDDLAEQAELELRHKLKTAFAKSFCEKVETM-----TK 798  
\* : \* : \* : \* \* : : \* : \* : : :

|          |                                                                |      |
|----------|----------------------------------------------------------------|------|
| Sc-SPT16 | GLLTVENTFRDLGFQGVPNRSVAVFCMPTTDCVLQLEPPFLVINLEEEVICILERVQFGL   | 880  |
| At-SPT16 | LDLEFDQPLRELGFHGVPHKTSAFI IPTSSCLVELIEYPPFLVSVLSEIEIVNLERVGFQ  | 879  |
| Ta-SPT16 | LDLEFDIPLRELGFHGVVYKASAFI IPTSTCLVELIETPFLVVTLGEIEIVNLERVGFQ   | 867  |
| Os-SPT16 | LDLEFDVPLRELGFHGVVYKASAFI IPTSTCLVELIETPFLVVTLSEIEIVNLERVGFQ   | 865  |
| Sb-SPT16 | LDLEFDVPLRELGFYGVVYKASAFI IPTSTCLVELIENPFLVSVLSEIEIVNLERVGFQ   | 864  |
| Zm-Spt16 | LDLEFDVPLRELGFHGVVYKASAFI IPTSTCLVELIETPFLVSVLSEIEIVNLERVGFQ   | 877  |
| Gm-SPT16 | LDLEFDQPLRELGFPGVPHKSSVFIVPTSACLVELIETPFLVVTLSEIEIVNLERVGLGQ   | 877  |
| Pt-SPT16 | LDLEFDQPLRELGFHGVPHKVSFIVPTSACLVELIETPFLVVTLGEIEIVNLERVGLGQ    | 877  |
| Vv-SPT16 | LDLEFDQPLRELGFHGVPHKASAFI VPTSACLVELIETPFLVITLSEIEIVNLERVGLGQ  | 881  |
| Sm-SPT16 | YGLEFDIPFRELGFHGVPNKTSAFI VPTVKCLVELIEFPFLVTVEDIELVNLERVGFAQ   | 872  |
| Pp-SPT16 | LDLEFDIPFRELGFHGVPNKSSAFI VPTVNCLVELIETPFLVSVLNDIEIVNLERVGLGQ  | 870  |
| Hs-SPT16 | ELEFEVFPFRDLGFNGAPYRSTCLLQPTSSALVNATEWPPFVVTLDEVELIHFERVQFHL   | 852  |
| Dm-SPT16 | SVVEFDTPFRELGFPGAPFRSTVTLQPTSGSLVNLTEWPPFVITLDDVELVHFERVQFHL   | 858  |
|          | : .: :*:*** *. * : : ** .** : * * :*: : :*: :*** :             |      |
| Sc-SPT16 | KNFDMVFVYKDFNKPVTHINTVPIESLDFLKQWLTDMDIPYTVSTINLNWATIMKSLQDD   | 940  |
| At-SPT16 | KNFDMAIIFKDFKDKDVLRVDSVPTSSLEGIKEWLDTTDIKYYESKLNLNWRQILKTIIDD  | 939  |
| Ta-SPT16 | KNFDMAIVFKDFKDKDVLRLIDSIPSTSLDAIKEWLDTTDLKYYESRLNLNWRPILKTIIDD | 927  |
| Os-SPT16 | KNFDMAIVFKDFKDKDVLRLIDSIPSTSLDAIKEWLDTTDLKYYESRLNLNWRPILKTIIDD | 925  |
| Sb-SPT16 | KNFDMAIVFKDFKDKDVLRLIDSIPASLDAIKEWLDTTDLKYYESRLNLNWRPILKTIIDD  | 924  |
| Zm-Spt16 | KNFDMAIVFKDFKDKDVLRLIDSIPASLDAIKEWLDTTDLKYYESRLNLNWRPILKTIIDD  | 937  |
| Gm-SPT16 | KNFDMTIVFKDFKRDVLRIDSIPSTSLDGKIKEWLDTTDIKYYESRLNLNWRQILKTIIDD  | 937  |
| Pt-SPT16 | KNFDMTIVFKDFKRDVLRIDSIPSTSLDGKIKEWLDTTDIKYYESRLNLNWRQILKTIIDD  | 937  |
| Vv-SPT16 | KNFDMTIVFKDFKRDVLRIDSIPSTSLDGKIKEWLDTTDLKYYESRLNLNWRPILKTIIDD  | 941  |
| Sm-SPT16 | KAFDMAIIFKDFKDKDVLRLIDAIPTSLDNKIKEWLNSMAIKYYESRMNLNWRPILKTIIDD | 932  |
| Pp-SPT16 | KAFDMAIVFKDFKREVLRLIDAIPTSLDGKIKEWLNSMNIKYYESRMNLNWRPILKTIIDD  | 930  |
| Hs-SPT16 | KNFDMVIVYKDYSKKVTMINAIPVSLDPIKEWLNSCDLKYTEGVQSLNWTIMKTIIDD     | 912  |
| Dm-SPT16 | RNFDMIVFVKEYNKKVAMVNAIPMNLMDHVKEWLNSCDIRYSEGVQSLNWTIMKTIIDD    | 918  |
|          | : *** .:*** : * :*: * :*: * : * . *** *:* : *                  |      |
| Sc-SPT16 | PYQFFLDGGWNFLATGSDDEASD---ESEEVESEYEASEDDVSDSESAFSEDEEGSEVDD   | 996  |
| At-SPT16 | PQSFIDDDGGWEFLNLDGSDSESG---GSEESDKGYEPSDVEVESESEDEASESESLVES   | 995  |
| Ta-SPT16 | PQKFVDDGGWEFLNMEASDSEAE---ETEESDQGYEPSDAEPESESEEDSDSASLVES     | 983  |
| Os-SPT16 | PQKFIDDDGGWEFLNMEASDSETE---ETEESDQGYEPSDAEPESESEEDSDSASLVES    | 981  |
| Sb-SPT16 | PQKFIDDDGGWEFLNMEASDSETE---ETEESDQGYVPSDAEPESESEEDSDSASLVES    | 980  |
| Zm-Spt16 | PQKFIDDDGGWEFLNMEASDSETE---DTEESDQGYVPSDAEPESESEEDSDSASLVES    | 993  |
| Gm-SPT16 | PQSFIEGGGWEFLNLEATDSESE---NSEESDKGYEPSDVEPESEDEASDSESLVES      | 993  |
| Pt-SPT16 | PQSFIDDDGGWEFLNLEASDSDSD---NSEDSDQGYIPSDAEPESESEEDVSDSASLVES   | 993  |
| Vv-SPT16 | PEKFIEDGGWEFLNLEVSDDSDSE---NSQESDQGYEPSDVQSDTGSEEEGDDSESLVES   | 997  |
| Sm-SPT16 | PKKFIDDDGGWEFLNMEASDSESE---KSEESDKGYEPSDLEPSESEDEGSDSESVVES    | 988  |
| Pp-SPT16 | PKKFIEDGGWEFLNMEASDSESD---KSEESDEGYEPSDVEVSESEEDSDSDES SVVES   | 986  |
| Hs-SPT16 | PEGFFEQQGWSFLEPEGEESDAEEGSDSESEIEDETFNPSEDDYEEEEED--SDEYSSEA   | 970  |
| Dm-SPT16 | PEGFFEQQGWTFLDPESGSEGENE--TAESEDEAYNPTDAES--DEESD--EDSEYSEAS   | 973  |
|          | * * . *** ** . . . . : : : . . :                               |      |
| Sc-SPT16 | DISGDESEDYTGDESEEGEDWDELEKKAARADRGANFRD-----                   | 1035 |
| At-SPT16 | -DDDEEDSEQSEEEKGKTWDELEREATNADREHGVEDSEERKRRKMKAFGKSRPQT       | 1054 |
| Ta-SPT16 | -DEDEEEDSDESEEEKGKTWDELEREATNADRDHGAESDSEERRRRKVKTFKSGAPP      | 1042 |
| Os-SPT16 | -DEDEEDDSEEDSEEEKGKTWEELEREASNADRENGAESDSEERRRRKVKTFKSRPPP     | 1040 |
| Sb-SPT16 | -DDDE-ESDESEEEKGKTWEELEREASNADREHGAESDSEERRRRKAKTFKSKRAPE      | 1038 |
| Zm-Spt16 | -DDDDE-ESDESEEEKGKTWEELEREASNADREHGAESDSEERRRRKAKTFKSKRAPE     | 1051 |
| Gm-SPT16 | -EDDGEEDSEEDSEEEKGKTWEELEREASNADREKGNESDSEEDRKRKAKSFGKSRGAG    | 1052 |
| Pt-SPT16 | -EDDEEEDSEEDSEEEKGKTWEELEREASNADREKGDSDSEERNRRKVKTFKSKRAP      | 1052 |
| Vv-SPT16 | -EDDVEEDSDGDESEEQGKTWEELEREASNADREKREKGDSEERKRRKMKAFGKARVPE    | 1056 |
| Sm-SPT16 | -EDDEE--EEDSDEEEEGMSWDELEAKASKEDKEKGDSESEERRRRKAKMTGKTRASP     | 1045 |
| Pp-SPT16 | -DDDEA-EEEESEEEGLTWDQLEEAARKDDKMGDEEDSEDERHRNRKKAAGKGRMPD      | 1044 |
| Hs-SPT16 | -EESDYSKESLGSSEESGKDWDLEEEARKADRESRYEEEEEQSRMSRKR---KASVHS     | 1026 |
| Dm-SPT16 | -EDSEESDEDLGSDEESGKDWDLEREAEEEDRNHDYAADDKPRNGKFDKSKHGKSSKHS    | 1032 |
|          | . . . . :*. * * : ** * . * :                                   |      |
| Sc-SPT16 | -----                                                          | 1035 |
| At-SPT16 | SGGGSSSMKN-----M--PPSK-----RKHR                                | 1074 |
| Ta-SPT16 | QRGPSSSKHAPLPQRGG---SSSGNKS--PPSSSK-----GPPSKPKFR              | 1085 |
| Os-SPT16 | ER-----SSFK-----G-GPSKPKFR                                     | 1056 |
| Sb-SPT16 | -R-----SSFK-----GAPPSKPKFR                                     | 1054 |
| Zm-Spt16 | -R-----SSFK-----GAPPSKPKFR                                     | 1067 |
| Gm-SPT16 | L-----S-----SSMTKRPKLR                                         | 1064 |
| Pt-SPT16 | RPAPRPAPR-----PAPR--PPRTVP-----GSMPKRPKFR                      | 1082 |
| Vv-SPT16 | -----KRSTR-----GSLPKRPKLR                                      | 1071 |
| Sm-SPT16 | K-----APPKRFKTR                                                | 1056 |
| Pp-SPT16 | PR-----DAK-----RGQPNKRPKVR                                     | 1060 |
| Hs-SPT16 | SGRG-----SNRGRHSSA-----PPKRRK-----                             | 1047 |
| Dm-SPT16 | PSKSSK--DKYNSRDKHHSSSSSGNKSSSKDKDRKRSRDRDNGHKS KSRH-           | 1083 |

Figure S2. Amino acid sequence alignment of SPT16 from different organisms. Sequences (plant, green; metazoan, red; fungal, blue) were retrieved by database searches using blastp (<https://blast.ncbi.nlm.nih.gov/>) using At-SPT16 as query. The sequences were aligned using Clustal Omega (<https://www.ebi.ac.uk/Tools/msa/clustalo/>). The species of which the protein sequences were retrieved are indicated as follows: *Arabidopsis thaliana* (At), *Drosophila melanogaster* (Dm), *Glycine max* (Gm), *Homo sapiens* (Hs), *Oryza sativa* (Os), *Physcomitrella patens* (Pp), *Populus trichocarpa* (Pt), *Saccharomyces cerevisiae* (Sc), *Selaginella moellendorffii* (Sm), *Sorghum bicolor* (Sb), *Triticum aestivum* (Ta), *Vitis vinifera* (Vv), *Zea mays* (Zm).
